# Supplementary material
Source: PubMed Central journal article supplement (PMC9703647)
Supplement: NIHMS1778432-supplement-Supplementary_table_1.pdf [file NIHMS1778432-supplement-Supplementary_table_1.pdf]

**Supplementary Table 1.** Oligonucleotide primers used in this study for cloning DNA fragments harboring *cepA*, *mac*, *covR/S*, *speB*, *emm*, *Rgg*, *RocA* genes from GAS genome.

| Primer   | Direction | Sequence                | Gene               |
|----------|-----------|-------------------------|--------------------|
| Cep F1   | Forward   | TTCAGGTGCTGACCTTGTTG    | <i>Cep(SpyCep)</i> |
| Cep R1   | Reverse   | TCAGTTGTGGTTGGCTCAG     | <i>Cep(SpyCep)</i> |
| Cep F2   | Forward   | AGGAAGCGTTTTCTTGGTG     | <i>Cep(SpyCep)</i> |
| Cep R2   | Reverse   | CGGCTTCTTTGCTATTACCG    | <i>Cep(SpyCep)</i> |
| Cep F3   | Forward   | GTTTGATGCAGAGGCAGAGC    | <i>Cep(SpyCep)</i> |
| Cep R3   | Reverse   | CCCGCATCAGTTGACTCTTTG   | <i>Cep(SpyCep)</i> |
| Cep F4   | Forward   | TATGGTTTGGTCGTTTCTCC    | <i>Cep(SpyCep)</i> |
| Cep R4   | Reverse   | GGTGAGGTGGTCGTTTTTGT    | <i>Cep(SpyCep)</i> |
| Cep F5   | Forward   | TGGTAGCCAAACAGGAACAAG   | <i>Cep(SpyCep)</i> |
| Cep R5   | Reverse   | TGGTCTCTGAACCAAGAGTG    | <i>Cep(SpyCep)</i> |
| Cep F6   | Forward   | GAAGGTTTTGTCCGCTTTAG    | <i>Cep(SpyCep)</i> |
| Cep R6   | Reverse   | CACCAGCTAATCCACGGTCT    | <i>Cep(SpyCep)</i> |
| Cep F7   | Forward   | CCCTGTTAGGCACAGCATT TTC | <i>Cep(SpyCep)</i> |
| Cep R7   | Reverse   | ACACTAGCGCCTGCTTGACT    | <i>Cep(SpyCep)</i> |
| Cep F8   | Forward   | TCACAAATCAAGCCCAGCT     | <i>Cep(SpyCep)</i> |
| Cep R8   | Reverse   | CCCGCACAAAGGTAGGTAAAG   | <i>Cep(SpyCep)</i> |
| Cep F9   | Forward   | CCTTGTCGAAGATAGAGCTGGT  | <i>Cep(SpyCep)</i> |
| Cep R9   | Reverse   | ACTATGCGCAACTTGAGAC     | <i>Cep(SpyCep)</i> |
| Cep F10  | Forward   | TGCCTCAGATTCAACTGGTG    | <i>Cep(SpyCep)</i> |
| Cep R10  | Reverse   | TCACTGCGCACGTAGAAATC    | <i>Cep(SpyCep)</i> |
| Mac F1   | Forward   | ACCTCTCCAATAACCCATAC    | <i>Mac(IdeS)</i>   |
| Mac R1   | Reverse   | CATACCATCCTTGGTTAGC     | <i>Mac(IdeS)</i>   |
| Mac F2   | Forward   | GCAGTATTGGCAGCAGTGAC    | <i>Mac(IdeS)</i>   |
| Mac R2   | Reverse   | TAGAGCCTTGCCTTCGGTT     | <i>Mac(IdeS)</i>   |
| Mac F3   | Forward   | AACGGCTACCGCCTTAGTCT    | <i>Mac(IdeS)</i>   |
| Mac R3   | Reverse   | GCTATTGGGTTTTGCGTCAT    | <i>Mac(IdeS)</i>   |
| Mac F4   | Forward   | TGTTAATTCCGCTGGAAAAGT   | <i>Mac(IdeS)</i>   |
| Mac R4   | Reverse   | TGGAGATGCCTTTTTCCATT    | <i>Mac(IdeS)</i>   |
| CovRS F1 | Forward   | GCTATTCCGGTACAGGTCT     | <i>CovR</i>        |
| CovRS R1 | Reverse   | GCGGAAAATAGCACGAATAC    | <i>CovR</i>        |
| CovRS F2 | Forward   | GTCAATGGTCGTGAAGGGT     | <i>CovR</i>        |
| CovRS R2 | Reverse   | AGGCAATCAGTGTAAGGCA     | <i>CovR</i>        |
| CovRS F3 | Forward   | GATGTCTATATTCGTTATCTCC  | <i>CovS</i>        |
| CovRS R3 | Reverse   | TTGTACGCGAACCATGTC      | <i>CovS</i>        |

|          |         |                            |             |
|----------|---------|----------------------------|-------------|
| CovRS F4 | Forward | GCATATTGGTCTCTTACAAC       | <i>CovS</i> |
| CovRS R4 | Reverse | TTGCTCTCGTGTGCCATCT        | <i>CovS</i> |
| SpeB F1  | Forward | TTTCTTGTCAACTGAAATGAGC     | <i>SpeB</i> |
| SpeB R1  | Reverse | TTGTAAACATACATATTAGAGCC    | <i>SpeB</i> |
| SpeB F2  | Forward | ACCCAGTATTTGCCGATC         | <i>SpeB</i> |
| SpeB R2  | Reverse | GAACGTTAGATTCTCTTCCGCTAT   | <i>SpeB</i> |
| SpeB F3  | Forward | TGCAGCTACAGGATGTGTTG       | <i>SpeB</i> |
| SpeB R3  | Reverse | GTGTTTTTCGGCACAAAAGGT      | <i>SpeB</i> |
| SpeB F4  | Forward | GTGGAGTCTCTGACGGCTTC       | <i>SpeB</i> |
| SpeB R4  | Reverse | GTTTTCTTGCCACGGTATGG       | <i>SpeB</i> |
| Emm F1   | Forward | TATTCGCTTAGAAAATTA AAAACAG | <i>Emm</i>  |
| Emm R1   | Reverse | GCGAGTTCTTCAGCTTG          | <i>Emm</i>  |
| Rgg1 F1  | Forward | CGAAACATTCAACTTGTTACG      | <i>Rgg1</i> |
| Rgg1 R1  | Reverse | GCTGTTGAGATAAACTACACC      | <i>Rgg1</i> |
| Rgg2 F1  | Forward | TTTCATGACTGTCTCCTTTCTG     | <i>Rgg2</i> |
| Rgg2 R1  | Reverse | GGCTACTGACTGCGTTTC         | <i>Rgg2</i> |
| Rgg3 F1  | Forward | CATAAGCGGACTTCCTTTCAG      | <i>Rgg3</i> |
| Rgg3 R1  | Reverse | TGATTGGCGTTTTCGTTAAAAG     | <i>Rgg3</i> |
| Rgg4 F1  | Forward | AGGTTAGTTTTTAATTAGACGCTG   | <i>Rgg4</i> |
| Rgg4 R1  | Reverse | TTTTAACATGGATAAAAACTCC     | <i>Rgg4</i> |
| Rgg4 F2  | Forward | TGATGATATTTTTAAGCGTTTAGG   | <i>Rgg4</i> |
| Rgg4 R2  | Reverse | TTTAACATGGATAAAAACTCCTTAAT | <i>Rgg4</i> |
| RocA F1  | Forward | TTACGGAGTTCGAAATGAAAAG     | <i>RocA</i> |
| RocA R1  | Reverse | CAAGTTAAATCAAGTCTGTCATC    | <i>RocA</i> |
| RocA F2  | Forward | CTTGTGTGTCCAAGGGATAG       | <i>RocA</i> |
| RocA R2  | Reverse | TTGGCAAAGCGGAAATTTAAC      | <i>RocA</i> |
